# Supplementary material for: PIM Kinases Are a Potential Prognostic Biomarker and Therapeutic Target in Neuroblastoma
Source: Oxford University Press journal article supplement (doi:10.1158/1535-7163.mct-17-0868), 2018-02-13
Supplement: 15357163mct170868-sup-188896_2_supp_4431153_p0hrvf.pdf [file 15357163mct170868-sup-188896_2_supp_4431153_p0hrvf.pdf]

## Supplemental table 1

| Characteristics                 | Versteeg Data Set<br>(88 tumors) |    | Kocak Data Set<br>(476 tumors) |    |
|---------------------------------|----------------------------------|----|--------------------------------|----|
|                                 | No. of Tumors                    | %  | No. of Tumors                  | %  |
| Age (months), N (%)             |                                  |    |                                |    |
| ≤ 18                            | 48                               | 55 | 309                            | 65 |
| > 18                            | 40                               | 45 | 167                            | 35 |
| Female sex, N (%)               | 35                               | 40 | 196                            | 41 |
| MYCN copy number, N (%)         |                                  |    |                                |    |
| Amplified (>5 copies)           | 16                               | 18 | 67                             | 14 |
| Wildtype                        | 72                               | 82 | 409                            | 86 |
| INSS tumor stage, N (%)         |                                  |    |                                |    |
| 1                               | 8                                | 9  | 119                            | 25 |
| 2                               | 15                               | 17 | 78                             | 16 |
| 3                               | 13                               | 15 | 70                             | 15 |
| 4                               | 40                               | 45 | 148                            | 31 |
| 4S                              | 12                               | 14 | 61                             | 13 |
| Patients with recurrence, N (%) | 35                               | 40 | 153                            | 32 |
