# Supplementary material for: PIM Kinases Are a Potential Prognostic Biomarker and Therapeutic Target in Neuroblastoma
Source: Oxford University Press journal article supplement (doi:10.1158/1535-7163.mct-17-0868), 2018-02-13
Supplement: 15357163mct170868-sup-188896_2_supp_4465450_p1b555.pdf [file 15357163mct170868-sup-188896_2_supp_4465450_p1b555.pdf]

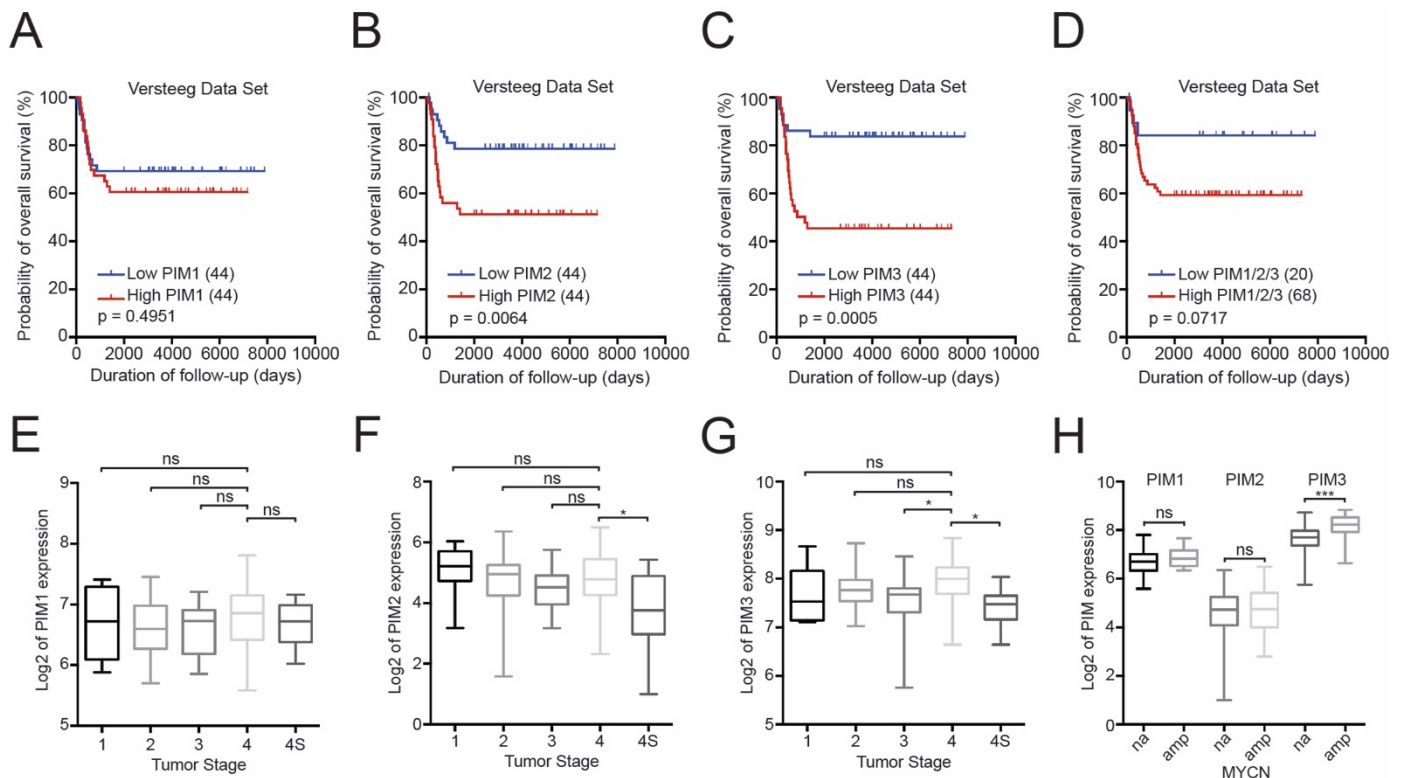

### Supplemental figure 1. PIM expression and overall survival Versteeg cohort

(A-D) High *PIM2* and *-3* mRNA expression correlates with poor overall survival in neuroblastoma. Kaplan-Meier survival curves of the Versteeg cohort (88 patients) demonstrate overall patient survival, using median *PIM* expression as a cut-off value for high versus low expression. High *PIM1/2/3* indicates patients with high expression of either *PIM1*, *-2*, or *-3*. P-values were calculated using a log-rank test.

(E-G) *PIM* expression across tumor stages (Versteeg cohort). P-values were calculated using a one-way ANOVA and Dunnett's test.  $p \leq 0.05$  (\*)

(H) *PIM* expression in *MYCN* amplified and non-amplified tumors (Versteeg cohort). P-values were calculated using an unpaired T-test.  $p \leq 0.001$  (\*\*\*)
