# Supplementary material for: PIM Kinases Are a Potential Prognostic Biomarker and Therapeutic Target in Neuroblastoma
Source: Oxford University Press journal article supplement (doi:10.1158/1535-7163.mct-17-0868), 2018-02-13
Supplement: 15357163mct170868-sup-188896_2_supp_4465452_p1b55m.pdf [file 15357163mct170868-sup-188896_2_supp_4465452_p1b55m.pdf]

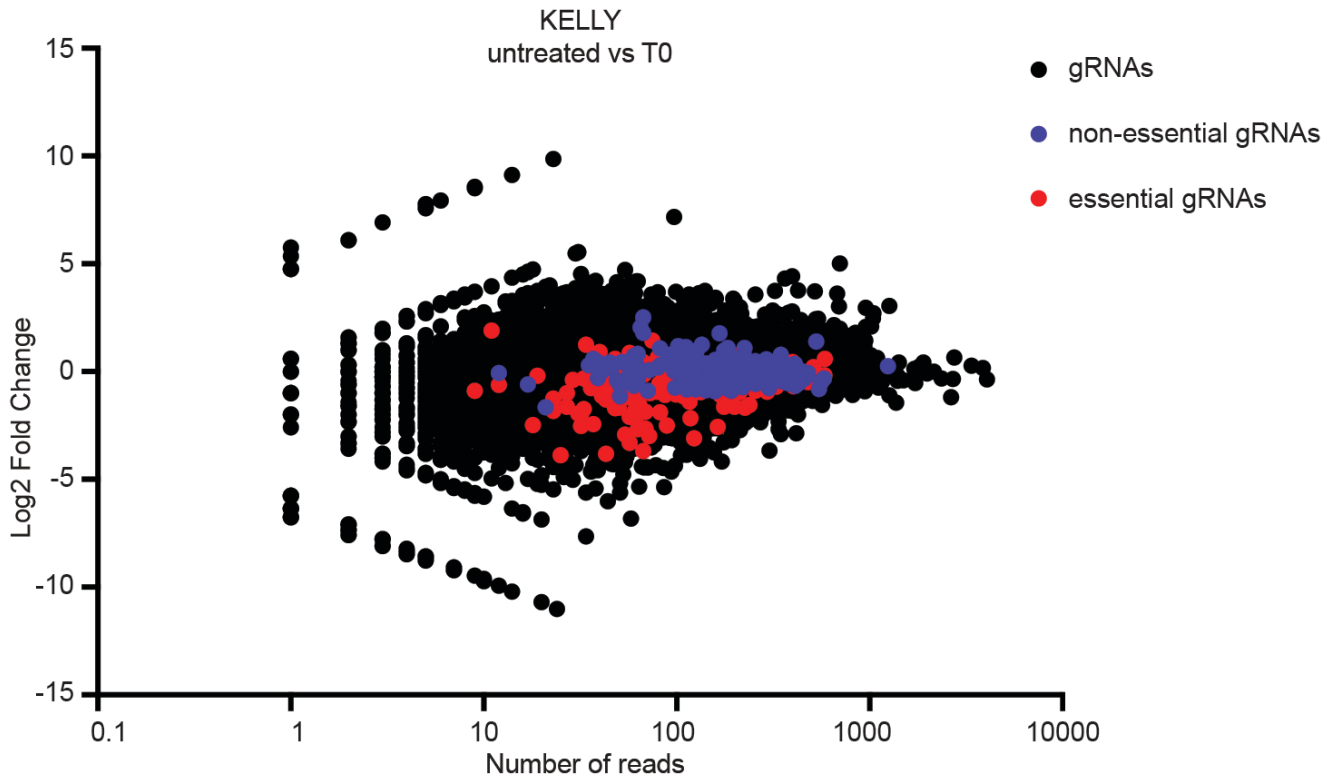

### Supplemental figure 3. gRNAs targeting essential genes are depleted in time

The x-axis depicts the average number of sequencing reads in the untreated/ $T_0$  samples. The y-axis depicts the log<sub>2</sub> fold change in abundance of gRNAs in the untreated versus  $T_0$  population. gRNAs targeting essential genes are depicted in red, gRNAs targeting non-essential genes are depicted in blue, and all other gRNAs in the library are depicted in black.
