# Supplementary material for: PIM Kinases Are a Potential Prognostic Biomarker and Therapeutic Target in Neuroblastoma
Source: Oxford University Press journal article supplement (doi:10.1158/1535-7163.mct-17-0868), 2018-02-13
Supplement: 15357163mct170868-sup-188896_2_supp_4465453_p1b55d.pdf [file 15357163mct170868-sup-188896_2_supp_4465453_p1b55d.pdf]

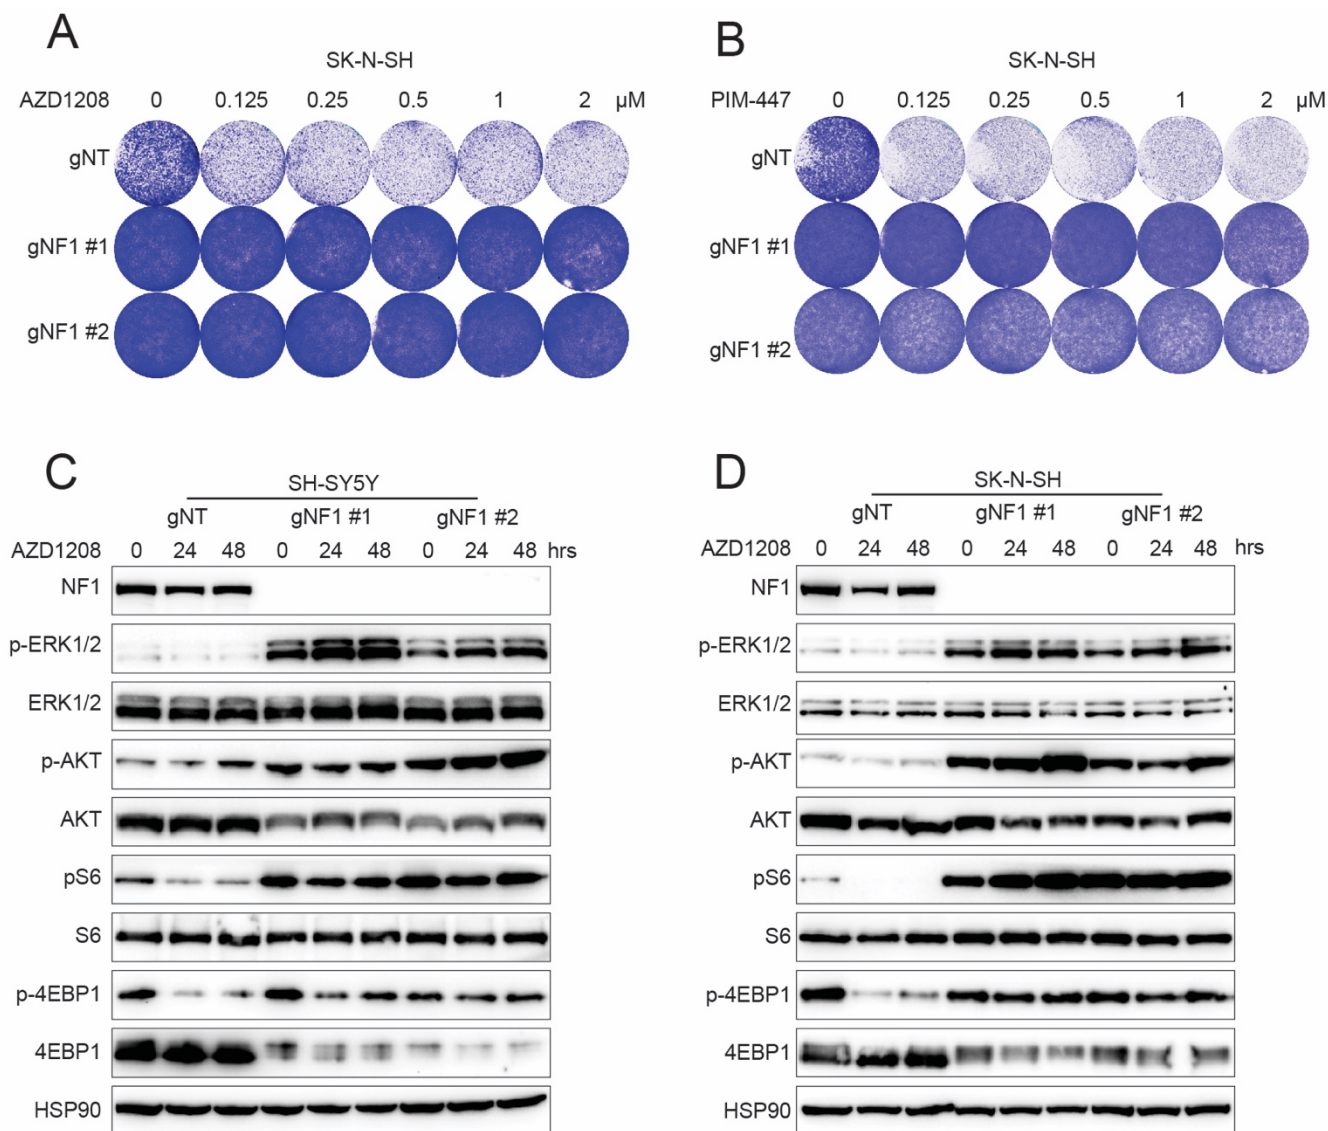

#### Supplemental figure 4. *NF1* knockout induces PIM inhibitor resistance

(A-B) *NF1* loss results in PIM inhibitor resistance in a colony formation assay. SK-N-SH cells were plated in 6-well plates and treated with increasing concentrations of AZD1208 or PIM-447. Drug-containing medium was refreshed every 3 days. Cells were fixed, stained, and scanned when untreated wells of each particular cell line reached confluency (n=3).

(C-D) *NF1* knockout results in enhanced MAPK and AKT signaling and sustained mTOR signaling upon PIM inhibition. SH-SY5Y and SK-N-SH cell lines were treated with 2  $\mu$ M AZD1208 for 0, 24, and 48 hours followed by western blot analysis (n=3).
