# Supplementary material for: PIM Kinases Are a Potential Prognostic Biomarker and Therapeutic Target in Neuroblastoma
Source: Oxford University Press journal article supplement (doi:10.1158/1535-7163.mct-17-0868), 2018-02-13
Supplement: 15357163mct170868-sup-188896_2_supp_4465454_p1b55j.pdf [file 15357163mct170868-sup-188896_2_supp_4465454_p1b55j.pdf]

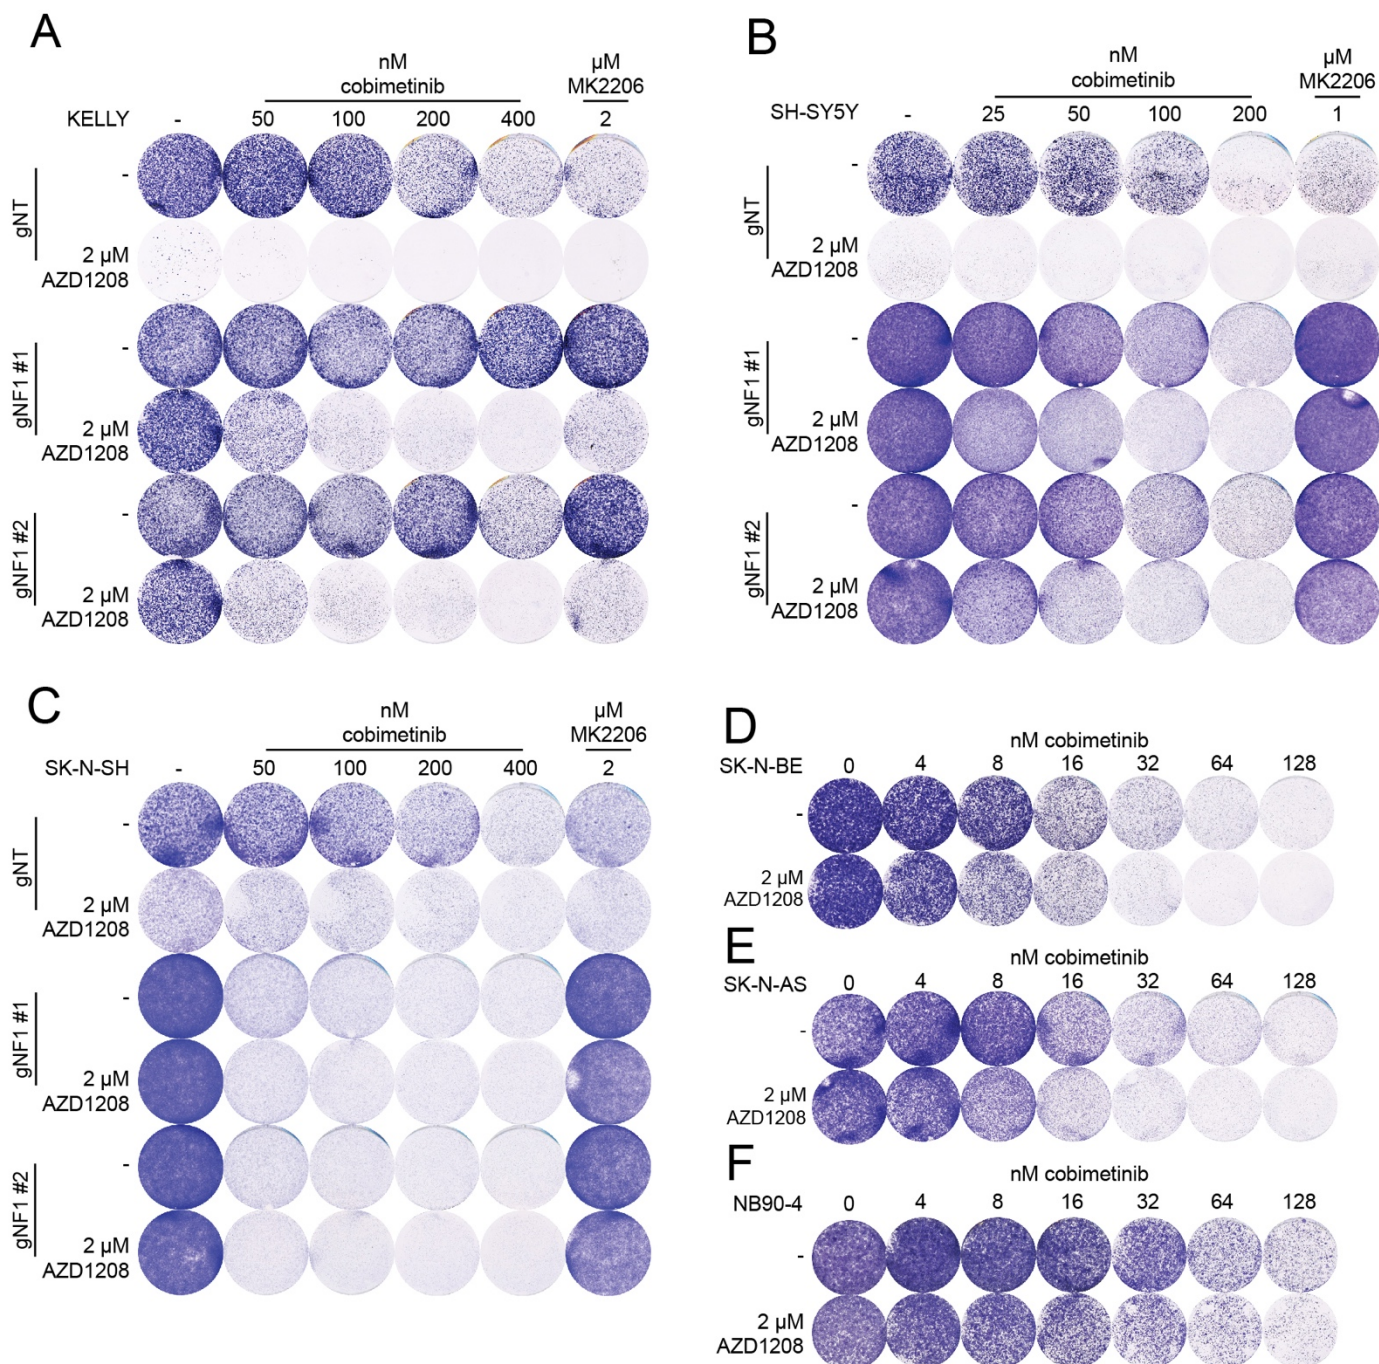

**Supplemental figure 5. Combined PIM/MEK inhibition restores sensitivity to AZD1208 in *NF1* knock out cell lines**

(A-F) The indicated cell lines were plated in 6-well plates and treated with AZD1208, cobimetinib, MK2206 or the combination. Drug-containing medium was refreshed every 3 days. Cells were fixed, stained, and scanned when untreated wells reached confluency (n=3).
