# Supplementary material for: PIM Kinases Are a Potential Prognostic Biomarker and Therapeutic Target in Neuroblastoma
Source: Oxford University Press journal article supplement (doi:10.1158/1535-7163.mct-17-0868), 2018-02-13
Supplement: 15357163mct170868-sup-188896_2_supp_4465455_p1b55h.pdf [file 15357163mct170868-sup-188896_2_supp_4465455_p1b55h.pdf]

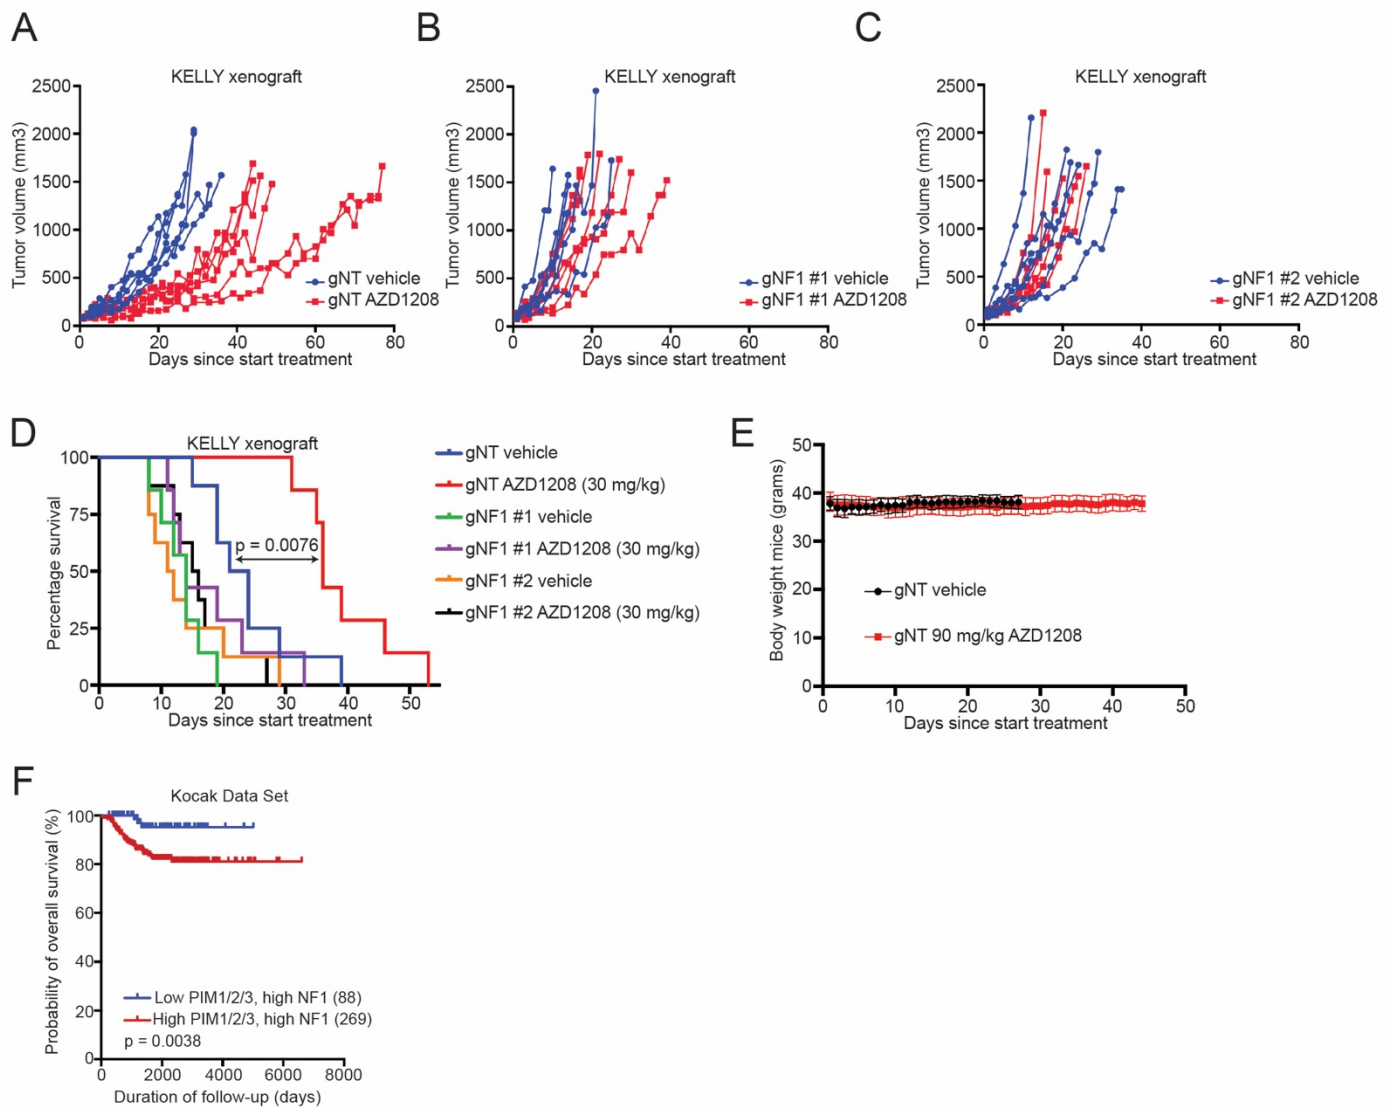

### Supplemental figure 6. AZD1208 suppresses *in vivo* growth of KELLY cells

(A-C) KELLY cells ( $1 \cdot 10^6$  cells) were subcutaneously implanted in NMRI mice. Once tumors were established ( $80 \text{ mm}^3$ ), animals were treated with vehicle or AZD1208 (90 mg/kg). Each line represents one tumor.

(D) KELLY cells ( $5 \cdot 10^6$  cells) were subcutaneously implanted in NMRI mice. Once tumors were established ( $200 \text{ mm}^3$ ), animals were treated with vehicle or AZD1208 (30 mg/kg). Each line represents one tumor.

(E) Body weight of mice injected with gNT KELLY cells and treated with vehicle or 90 mg/kg AZD1208.

(F) High *PIM* mRNA expression correlates with poor overall survival in *NF1* expressing neuroblastoma. Kaplan-Meier survival curve of the Kocak cohort demonstrate overall patient survival, using median *PIM* expression as a cut-off value for high versus low *PIM* expression. High PIM1/2/3 indicates patients with high expression of either *PIM1*, -2, or -3. High *NF1* expression was determined using the 25% percentile as a cut-off. P-values were calculated using a log-rank test.
